# Supplementary material for: Effectiveness of Spinal Stabilization Exercises on Movement Performance in Adults with Chronic Low Back Pain
Source: PubMed Central journal article supplement — Int J Sports Phys Ther. 2023 Feb 1;18(1):169–72. doi: 10.26603/001c.68024 (PMC9897033; doi:10.26603/001c.68024), 2023-02-01
Supplement: ijspt_2023_18_1_68024_135993.pdf [file ijspt_2023_18_1_68024_135993.pdf]

Appendix A: Functional Movement Screen™

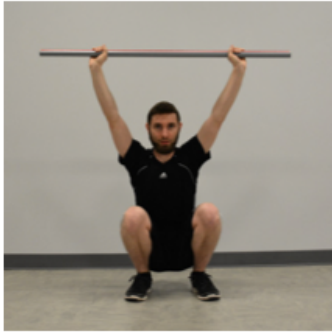

**Deep Squat  
(Frontal View)**

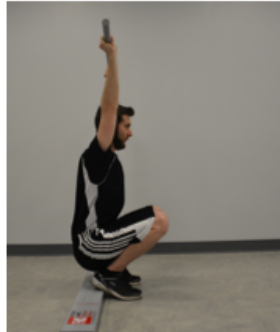

**Deep Squat  
(Sagittal View)**

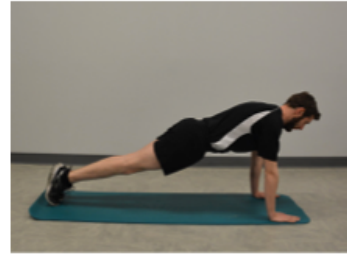

**Trunk Push-Up**

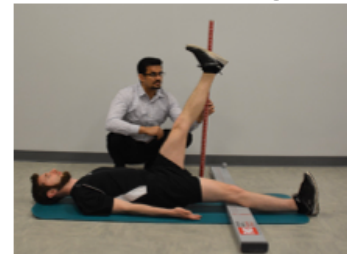

**Active Straight Leg Raise**

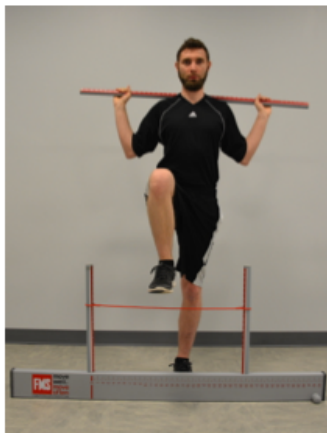

**Hurdle Step  
(Frontal View)**

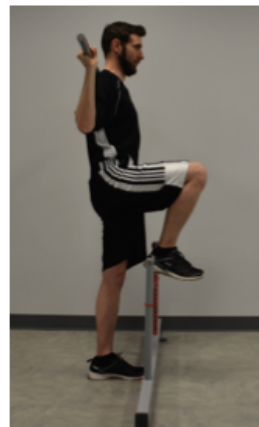

**Hurdle Step  
(Sagittal View)**

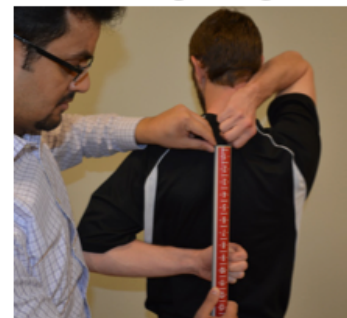

**Shoulder Mobility**

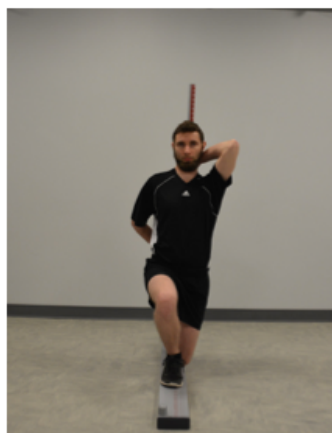

**In-line lunge  
(Frontal View)**

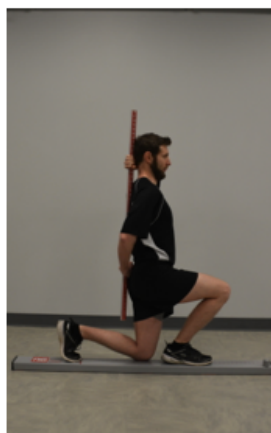

**In-line lunge  
(Sagittal View)**

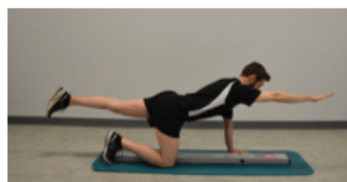

**Rotary Stability (Extended Position)**

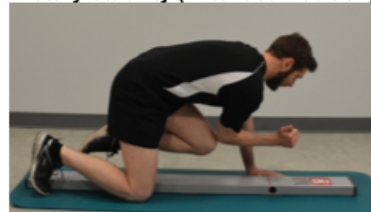

**Rotary Stability (Flexed Position)**

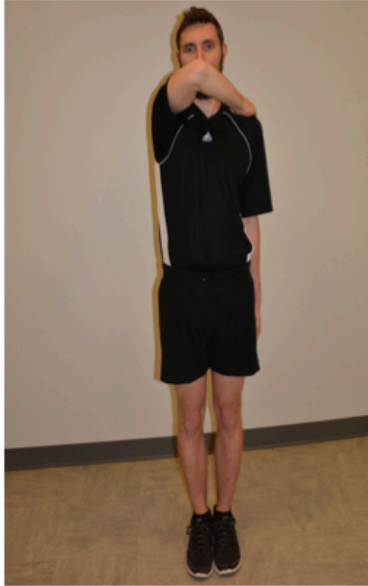

**Impingement-clearing test**

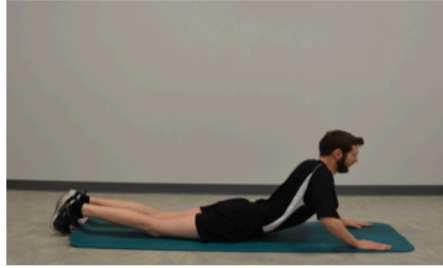

**Press-up clearing test**

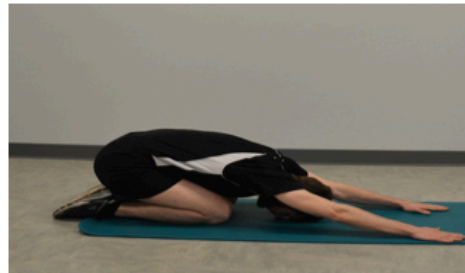

**Posterior-rocking clearing test**
