# Supplementary material for: Effectiveness of Spinal Stabilization Exercises on Movement Performance in Adults with Chronic Low Back Pain
Source: PubMed Central journal article supplement — Int J Sports Phys Ther. 2023 Feb 1;18(1):169–72. doi: 10.26603/001c.68024 (PMC9897033; doi:10.26603/001c.68024), 2023-02-01
Supplement: ijspt_2023_18_1_68024_135994.pdf [file ijspt_2023_18_1_68024_135994.pdf]

**Appendix B:** Spinal Stabilization Exercises with Progression Criteria (Adapted from Hicks et al.).<sup>32</sup> Each participant performed one exercise from each of the following 4 categories:

Abdominal bracing, quadruped, prone plank, and side plank exercises.

| Exercise                              | Progression (A → B → C)                               | Duration                                           | Figure                                                                               |
|---------------------------------------|-------------------------------------------------------|----------------------------------------------------|--------------------------------------------------------------------------------------|
| <b>1. Abdominal Bracing Exercises</b> | A. Bracing with heel slides                           | 15 repetitions per leg with 4 seconds hold         | 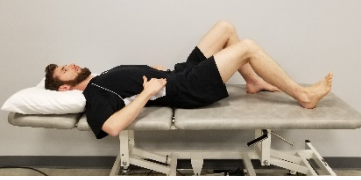   |
|                                       | B. Bracing with leg lifts                             | 15 repetitions per leg with 4 seconds hold         |    |
|                                       | C. Bracing with bridging                              | 30 repetitions with 8 seconds hold                 |   |
| <b>2. Quadruped Exercises</b>         | A. Quadruped arm lifts with bracing                   | 15 repetitions per arm with 8 seconds hold         |  |
|                                       | B. Quadruped leg lifts with bracing                   | 15 repetitions per leg with 8 seconds hold         |  |
|                                       | C. Quadruped alternate arm and leg lifts with bracing | 15 repetitions per arm and leg with 8 seconds hold |  |

|                                 |                                   |                                                  |                                                                                      |
|---------------------------------|-----------------------------------|--------------------------------------------------|--------------------------------------------------------------------------------------|
| <b>3. Prone Plank Exercises</b> | A. Knee plank                     | 30 repetitions with 8 seconds hold               |    |
|                                 | B. Prone plank                    | 30 repetitions with 8 seconds hold               |    |
|                                 | C. Prone plank with leg lifts     | 15 repetitions per leg with 8 seconds hold       |    |
| <b>4. Side Plank Exercises</b>  | A. Side plank with knees flexed   | 15 repetitions for each side with 8 seconds hold |   |
|                                 | B. Side plank with knees extended | 15 repetitions for each side with 8 seconds hold |  |
|                                 | C. Side plank with leg lifts      | 15 repetitions for each side with 8 seconds hold |  |
