# Supplementary material for: Effectiveness of Spinal Stabilization Exercises on Movement Performance in Adults with Chronic Low Back Pain
Source: PubMed Central journal article supplement — Int J Sports Phys Ther. 2023 Feb 1;18(1):169–72. doi: 10.26603/001c.68024 (PMC9897033; doi:10.26603/001c.68024), 2023-02-01
Supplement: ijspt_2023_18_1_68024_135995.pdf [file ijspt_2023_18_1_68024_135995.pdf]

**Appendix C: General Exercise Program with Progression Criteria.** Each participant performed one exercise from each of the following 4 categories: Knee to chest, lower trunk rotation, prone press-ups, and Hamstring Stretch exercises.

| Exercise                         | Progression (A → B → C)                         | Duration                                          | Figure                                                                               |
|----------------------------------|-------------------------------------------------|---------------------------------------------------|--------------------------------------------------------------------------------------|
| <b>1. Knee to Chest Exercise</b> | A. Single knee to chest exercise with pain free | 10 repetitions per leg with 10 seconds hold       |    |
|                                  | B. Single knee to chest exercise to end range   | 10 repetitions per leg with 10 seconds hold       |    |
|                                  | C. Double knees to chest exercise               | 20 repetitions with 10 seconds hold               |   |
| <b>2. Lower Trunk Rotation</b>   | A. Lower trunk rotation with pain free          | 10 repetitions for each side with 10 seconds hold |  |
|                                  | B. Lower trunk rotation to end range            | 10 repetitions for each side with 10 seconds hold |  |
|                                  | C. Lower trunk rotation with legs lifts         | 10 repetitions for each side with 10 seconds hold |  |

|                             |                                                  |                                             |                                                                                      |
|-----------------------------|--------------------------------------------------|---------------------------------------------|--------------------------------------------------------------------------------------|
| <b>3. Hamstring Stretch</b> | A. Hamstring stretch with pain free              | 10 repetitions per leg with 10 seconds hold |    |
|                             | B. Hamstring stretch with pain free to end range | 10 repetitions per leg with 10 seconds hold |    |
|                             | C. Seated Hamstring Stretch                      | 10 repetitions per leg with 10 seconds hold |    |
| <b>4. Prone Press-Ups</b>   | A. Prone on elbow                                | 20 repetitions with 10 seconds hold         |   |
|                             | B. Prone press-ups with pain free                | 20 repetitions with 10 seconds hold         |  |
|                             | C. Prone press-ups to end range                  | 20 repetitions with 10 seconds hold         |  |
